# Supplementary material for: A Multi-cell, Multi-scale Model of Vertebrate Segmentation and Somite Formation
Source: PubMed Central journal article supplement (PMC3188485; doi:10.1371/journal.pcbi.1002155), 2011-10-06
Supplement: pcbi.1002155.s013.pdf [file pcbi.1002155.s013.pdf]

## MODEL SEGMENTATION CLOCK NETWORK EQUATIONS

The ordinary differential equations used to model the segmentation clock are modified from those used by Goldbeter and Pourquié [12] with a few additions, mainly on the Delta-Notch pathway, to account for cell-cell synchronization [5] and increased connection between the internal pathways.

### Notch loop:

$$\frac{dN}{dt} = \varepsilon \left( v_{sN} - v_{dN} \cdot \frac{N}{K_{dN} + N} - N_{\text{Sig}} \right) \quad (\text{S1})$$

$$\frac{dN_a}{dt} = \varepsilon \left( N_{\text{Sig}} - v_{dNa} \cdot \frac{N_a}{K_{dNa} + N_a} - V_{\text{tr}} \right) \quad (\text{S2})$$

$$\frac{dN_{\text{an}}}{dt} = \varepsilon \left( V_{\text{tr}} - v_{dNan} \cdot \frac{N_{\text{an}}}{K_{dNan} + N_{\text{an}}} \right) \quad (\text{S3})$$

$$\frac{dMF}{dt} = \varepsilon \left( v_{sF} \cdot \frac{(N_{\text{an}} - N_{\text{ap}})^2}{KA^2 + (N_{\text{an}} - N_{\text{ap}})^2} - v_{mF} \cdot \frac{MF}{K_{dmF} + MF} \right) \quad (\text{S4})$$

$$\frac{dF}{dt} = \varepsilon \left( k_{sF} \cdot MF - v_{dF} \cdot \frac{F}{K_{dF} + F} \right) \quad (\text{S5})$$

$$\frac{dMDF}{dt} = \varepsilon \left( v_{sMDF} \cdot \frac{(N_{\text{an}} - N_{\text{ap}})^2}{K_{aMDF}^2 + (N_{\text{an}} - N_{\text{ap}})^2} - v_{dmDF} \cdot \frac{MDF}{K_{dmDF} + MDF} \right) \quad (\text{S6})$$

$$\frac{dDMF}{dt} = \varepsilon \left( k_{sDMF} \cdot MDF - v_{dDMF} \cdot \frac{DMF}{K_{dDMF} + DMF} \right) \quad (\text{S7})$$

$$\frac{dDL_c}{dt} = \varepsilon \left( k_{sDL} \cdot MDL \cdot \frac{(N_{\text{an}} - N_{\text{ap}})}{K_{Nan} + (N_{\text{an}} - N_{\text{ap}})} - k_{tDL} \cdot DL_c - v_{dDLc} \cdot \frac{DL_c}{K_{dDLc} + DL_c} \right) \quad (\text{S8})$$

$$\frac{dDL_m}{dt} = \varepsilon \left( k_{tDL} \cdot DL_c - v_{dDLm} \cdot \frac{DL_m}{K_{dDLm} + DL_m} \right) \quad (\text{S9})$$

$$N_{\text{Sig}} = k_c \cdot N \cdot \frac{K_{\text{IF}}^2}{K_{\text{IF}}^2 + F^2} \cdot \frac{DL_{\text{mSig}}}{K_{\text{aDL}} + DL_{\text{mSig}}} \quad (\text{S10})$$

$$DL_{\text{mSig}} = \frac{DL_{\text{mExt}}}{K_{\text{DL}} + DL_{\text{mExt}}} \quad (\text{S11})$$

$$V_{\text{tr}} = k_{t1} \cdot N_a - k_{t2} \cdot N_{\text{an}} \quad (\text{S12})$$

$$N_{\text{ap}} = v_{\text{Nap}} \cdot N_{\text{an}} \cdot \frac{K}{K_{\text{pN}} + K} \quad (\text{S13})$$

### Wnt loop:

$$\frac{dK}{dt} = \theta \cdot V_1 \quad (\text{S14})$$

$$\frac{dB}{dt} = \theta \left( v_{sB} - V_K \cdot \frac{AK}{K_t} + V_P + V_2 - k_{d1} \cdot B \right) \quad (S15)$$

$$\frac{dB_p}{dt} = \theta \left( V_K \cdot \frac{AK}{K_t} - V_P - k_{d2} \cdot B_p \right) \quad (S16)$$

$$\frac{dB_N}{dt} = -\theta \cdot V_2 \quad (S17)$$

$$\frac{dMAx}{dt} = \theta \left( v_0 + v_{MB} \cdot \frac{B_N^2}{K_{aB}^2 + B_N^2} + v_{MXa} \cdot \frac{X_a^2}{K_{aXa}^2 + X_a^2} - v_{md} \cdot \frac{MAx}{K_{md} + MAx} \right) \quad (S18)$$

$$\frac{dA}{dt} = \theta \left( k_{sAx} \cdot MAx - v_{dAx} \cdot \frac{A}{K_{dAx} + A} + V_1 \right) \quad (S19)$$

$$V_1 = d_1 \cdot AK - a_1 \cdot A \cdot K \quad (S20)$$

$$AK = K_t - K \quad (S21)$$

$$V_K = V_{MK} \cdot \frac{K_{ID}}{K_{ID} + D} \cdot \frac{B}{K_1 + B} \quad (S22)$$

$$V_P = V_{MP} \cdot \frac{B_p}{K_2 + B_p} \quad (S23)$$

$$V_2 = k_{i4} \cdot B_N - k_{i3} \cdot B \quad (S24)$$

**FGF loop:**

$$\frac{dRas_a}{dt} = \eta \left( V_{MaRas} \cdot \frac{Fgf^2}{K_{aFgf}^2 + Fgf^2} \cdot \frac{Ras_i}{K_{aRas} + Ras_i} - V_{MdRas} \cdot \frac{Ras_a}{K_{dRas} + Ras_a} \right) \quad (S25)$$

$$\frac{dERK_a}{dt} = \eta \left( V_{MaErk} \cdot \frac{Ras_a}{Ras_t} \cdot \frac{ERK_i}{K_{aErk} + ERK_i} - k_{cDusp} \cdot Dusp \cdot \frac{ERK_a}{K_{dErk} + ERK_a} \right) \quad (S26)$$

$$\frac{dX_a}{dt} = \eta \left( V_{MaX} \cdot \frac{ERK_a}{ERK_t} \cdot \frac{X_i}{K_{aX} + X_i} - V_{MdX} \cdot \frac{X_a}{K_{dX} + X_a} \right) \quad (S27)$$

$$\frac{dMDusp}{dt} = \eta \left( V_{MsMDusp} \cdot \frac{X_a^2}{K_{aMDusp}^2 + X_a^2} \left( v_{DuspDMF} \cdot \frac{K_{IMDusp}}{K_{IMDusp} + DMF} + v_{DuspX} \right) - V_{MdMDusp} \cdot \frac{MDusp}{K_{dMDusp} + MDusp} \right) \quad (S28)$$

$$\frac{dDusp}{dt} = \eta \left( k_{sDusp} \cdot MDusp - v_{dDusp} \cdot \frac{Dusp}{K_{dDusp} + Dusp} \right) \quad (S29)$$

$$Ras_i = Ras_t - Ras_a \quad (S30)$$

$$ERK_i = ERK_t - ERK_a \quad (S31)$$

$$X_i = X_t - X_a \quad (S32)$$
