# Supplementary material for: A Multi-cell, Multi-scale Model of Vertebrate Segmentation and Somite Formation
Source: PLoS Comput Biol. 2011 Oct 6;7(10):e1002155. doi: 10.1371/journal.pcbi.1002155 (PMC3188485; doi:10.1371/journal.pcbi.1002155)
Supplement: Table S1 — Model segmentation clock network parameters and initial conditions. (PDF) [file pcbi.1002155.s012.pdf]

## MODEL SEGMENTATION CLOCK NETWORK PARAMETERS AND INITIAL CONDITIONS

### Parameters:

#### Notch loop

| Parameter                     | Description                                                                        | Value                                       |
|-------------------------------|------------------------------------------------------------------------------------|---------------------------------------------|
| $V_{sN}$                      | Maximum rate of Notch synthesis                                                    | 0.23 nM/min                                 |
| $V_{dN}$                      | Maximum rate of Notch degradation                                                  | 2.82 nM/min                                 |
| $K_{dN}$                      | Michaelis constant for Notch degradation                                           | 1.4 nM                                      |
| $k_c$                         | Rate constant for Notch cleavage                                                   | $3.45 \text{ min}^{-1}$                     |
| $V_{dNa}$                     | Maximum rate of cytoplasmic NICD degradation                                       | 0.01 nM/min                                 |
| $K_{dNa}$                     | Michaelis constant for cytoplasmic NICD degradation                                | 0.001 nM                                    |
| $V_{dNan}$                    | Maximum rate of nuclear NICD degradation                                           | 0.1 nM/min                                  |
| $K_{dNan}$                    | Michaelis constant for nuclear NICD degradation                                    | 0.001 nM                                    |
| $K_{IF}$                      | Threshold constant for inhibition of Notch cleavage by Lfng                        | 0.45 nM                                     |
| $K_{aDL}$                     | Delta signaling threshold constant for Notch cleavage                              | 0.035 nM                                    |
| $k_{t1}$                      | Rate constant for NICD entry into nucleus                                          | $0.1 \text{ min}^{-1}$                      |
| $k_{t2}$                      | Rate constant for NICD exit from the nucleus                                       | $0.1 \text{ min}^{-1}$                      |
| <b><math>V_{Nap}</math></b>   | <b>Maximum fraction of NICD phosphorylated</b>                                     | <b>1.0</b>                                  |
| <b><math>K_{pN}</math></b>    | <b>Threshold constant for Gsk3<math>\beta</math>-mediated NICD phosphorylation</b> | <b>2.5 nM</b>                               |
| $V_{sF}$                      | Maximum rate of Lfng transcription                                                 | 3.24 nM/min                                 |
| $K_A$                         | Threshold constant for activation of Lfng gene by NICD                             | 0.05 nM                                     |
| $V_{mF}$                      | Maximum rate of Lfng mRNA degradation                                              | 1.92 nM/min                                 |
| $K_{dmF}$                     | Michaelis constant for Lfng mRNA degradation                                       | 0.768 nM                                    |
| $k_{sF}$                      | Rate constant for Lfng protein synthesis                                           | $0.3 \text{ min}^{-1}$                      |
| $V_{dF}$                      | Maximum rate of Lfng protein degradation                                           | 0.39 nM/min                                 |
| $K_{dF}$                      | Michaelis constant for Lfng protein degradation                                    | 0.37 nM                                     |
| <b><math>V_{sDMDF}</math></b> | <b>Maximum rate of DMF transcription</b>                                           | <b>0.497 nM/min</b>                         |
| <b><math>K_{aDMDF}</math></b> | <b>Michaelis constant for Notch activation of DMF</b>                              | <b>0.05 nM</b>                              |
| <b><math>V_{dmDMF}</math></b> | <b>Maximum rate of DMF mRNA degradation</b>                                        | <b>0.314 nM/min</b>                         |
| <b><math>K_{dmDMF}</math></b> | <b>Michaelis constant for DMF mRNA degradation</b>                                 | <b>0.4 nM</b>                               |
| <b><math>K_{sDMF}</math></b>  | <b>Rate constant for translation of DMF</b>                                        | <b><math>0.1047 \text{ min}^{-1}</math></b> |
| <b><math>V_{dDMF}</math></b>  | <b>Maximum rate of DMF protein degradation</b>                                     | <b>0.209 nM/min</b>                         |
| <b><math>K_{dDMF}</math></b>  | <b>Michaelis constant for DMF protein degradation</b>                              | <b>0.5 nM</b>                               |
| <b><math>k_{sDL}</math></b>   | <b>Rate constant for Delta protein synthesis</b>                                   | <b><math>0.75 \text{ min}^{-1}</math></b>   |
| <b><math>MDL</math></b>       | <b>Concentration of Delta mRNA</b>                                                 | <b>0.5 nM</b>                               |
| <b><math>K_{Nan}</math></b>   | <b>Michaelis constant for NICD stimulation of Delta translation</b>                | <b>0.04 nM</b>                              |
| <b><math>k_{tDL}</math></b>   | <b>Rate constant for Delta protein transport to membrane</b>                       | <b><math>0.5 \text{ min}^{-1}</math></b>    |
| <b><math>V_{dDLc}</math></b>  | <b>Maximum rate of Delta protein degradation in cytoplasm</b>                      | <b>0.5 nM/min</b>                           |
| <b><math>K_{dDLc}</math></b>  | <b>Michaelis constant for Delta protein degradation in cytoplasm</b>               | <b>0.5 nM</b>                               |
| <b><math>V_{dDLm}</math></b>  | <b>Maximum rate of Delta protein degradation on membrane</b>                       | <b>0.5 nM/min</b>                           |
| <b><math>K_{dDLm}</math></b>  | <b>Michaelis constant for Delta protein degradation on membrane</b>                | <b>0.5 nM</b>                               |
| <b><math>K_{DL}</math></b>    | <b>Threshold constant for Delta signaling</b>                                      | <b>0.08 nM</b>                              |
| $\epsilon$                    | Scaling factor for Notch loop                                                      | 0.43                                        |

Parameters in **bold** are additions to the Goldbeter-Pourquié model.

### Wnt loop

| Parameter | Description                                                               | Value                                  |
|-----------|---------------------------------------------------------------------------|----------------------------------------|
| $a_1$     | Rate constant for Gsk3 $\beta$ -Axin2 binding                             | 1.8 nM <sup>-1</sup> min <sup>-1</sup> |
| $d_1$     | Rate constant for Gsk3 $\beta$ -Axin2 dissociation                        | 0.1 min <sup>-1</sup>                  |
| $v_{sB}$  | Maximum rate of $\beta$ -catenin synthesis                                | 0.087 nM/min                           |
| $k_{t3}$  | Rate constant for $\beta$ -catenin entry into the nucleus                 | 0.7 min <sup>-1</sup>                  |
| $k_{t4}$  | Rate constant for $\beta$ -catenin exit from the nucleus                  | 1.5 min <sup>-1</sup>                  |
| $V_{MK}$  | Maximum rate of Gsk3 $\beta$ -mediated $\beta$ -catenin phosphorylation   | 4.5 nM/min                             |
| $K_t$     | Total Gsk3 $\beta$ concentration                                          | 3.0 nM                                 |
| $K_{ID}$  | Threshold constant for Dsh inhibition of $\beta$ -catenin phosphorylation | 0.5 nM                                 |
| $K_1$     | Michaelis constant for $\beta$ -catenin phosphorylation                   | 0.28 nM                                |
| $V_{MP}$  | Maximum rate of $\beta$ -catenin dephosphorylation                        | 1.0 nM/min                             |
| $K_2$     | Michaelis constant for $\beta$ -catenin dephosphorylation                 | 0.03 nM                                |
| $k_{d1}$  | Rate constant for unphosphorylated $\beta$ -catenin degradation           | 0.0 min <sup>-1</sup>                  |
| $k_{d2}$  | Rate constant for phosphorylated $\beta$ -catenin degradation             | 7.062 min <sup>-1</sup>                |
| $v_0$     | Basal rate of Axin2 transcription                                         | 0.06 nM/min                            |
| $v_{MB}$  | Maximum rate of $\beta$ -catenin activated Axin2 transcription            | 1.64 nM/min                            |
| $K_{aB}$  | Threshold constant for $\beta$ -catenin activation of Axin2               | 0.7 nM                                 |
| $v_{md}$  | Maximum rate of Axin2 mRNA degradation                                    | 0.8 nM/min                             |
| $K_{md}$  | Michaelis constant for Axin2 mRNA degradation                             | 0.48 nM                                |
| $v_{MXa}$ | Maximum rate of Xa activated Axin2 transcription                          | 0.5 nM/min                             |
| $K_{aXa}$ | Threshold constant for Xa activation of Axin2                             | 0.05 nM                                |
| $K_{sAx}$ | Rate constant for Axin2 translation                                       | 0.02 min <sup>-1</sup>                 |
| $v_{dAx}$ | Maximum rate of Axin2 protein degradation                                 | 0.6 nM/min                             |
| $K_{dAx}$ | Michaelis constant for Axin2 protein degradation                          | 0.63 nM                                |
| $\theta$  | Scaling factor for Wnt loop                                               | 1.12                                   |

### FGF loop

| Parameter     | Description                                            | Value                  |
|---------------|--------------------------------------------------------|------------------------|
| $Ras_t$       | Total concentration of Ras protein                     | 2.0 nM                 |
| $V_{MaRas}$   | Maximum rate of Ras activation                         | 4.968 nM/min           |
| $K_{aFgf}$    | FGF8 threshold constant for activation of Ras          | 0.5 nM                 |
| $K_{aRas}$    | Inactive Ras threshold constant for activation of Ras  | 0.103 nM               |
| $V_{MdRas}$   | Maximum rate of Ras activation                         | 0.41 nM/min            |
| $K_{dRas}$    | Michaelis constant for Ras inactivation                | 0.1 nM                 |
| $ERK_t$       | Total concentration of ERK protein kinase              | 2.0 nM                 |
| $V_{MaErk}$   | Maximum rate of Ras-mediated ERK activation            | 3.3 nM/min             |
| $K_{aErk}$    | Inactive ERK threshold constant for ERK activation     | 0.05 nM                |
| $K_{cDusp}$   | Rate constant for inactivation of ERK                  | 1.35 min <sup>-1</sup> |
| $K_{dErk}$    | Michaelis constant for inactivation of ERK             | 0.05 nM                |
| $X_t$         | Total concentration of factor X                        | 2.0 nM                 |
| $V_{MaX}$     | Maximum rate of ERK-mediated X activation              | 1.6 nM/min             |
| $K_{aX}$      | Threshold constant for ERK-mediated X activation       | 0.05 nM                |
| $V_{MdX}$     | Maximum rate of X inactivation                         | 0.5 nM/min             |
| $K_{dX}$      | Michaelis constant for X inactivation                  | 0.05 nM                |
| $V_{MsMDusp}$ | Maximum rate of Dusp6 transcription                    | 0.9 nM/min             |
| $K_{aMDusp}$  | Threshold constant for X-activated Dusp6 transcription | 0.5 nM                 |
| $V_{MdMDusp}$ | Maximum rate of Dusp6 mRNA degradation                 | 0.5 nM/min             |
| $K_{dMDusp}$  | Michaelis constant for Dusp6 mRNA degradation          | 0.5 nM                 |
| $k_{sDusp}$   | Rate constant for Dusp6 translation                    | 0.5 min <sup>-1</sup>  |

|                                 |                                                                |               |
|---------------------------------|----------------------------------------------------------------|---------------|
| $V_{dDusp}$                     | Maximum rate of Dusp6 protein degradation                      | 2.0 nM/min    |
| $K_{dDusp}$                     | Michaelis constant for Dusp6 protein degradation               | 0.5 nM        |
| <b><math>v_{DuspX}</math></b>   | <b>Fraction of Dusp6 transcription solely regulated by X</b>   | <b>0.2</b>    |
| <b><math>v_{DuspDMF}</math></b> | <b>Fraction of Dusp6 transcription under regulation by DMF</b> | <b>0.8</b>    |
| <b><math>K_{IMDusp}</math></b>  | <b>Threshold constant for DMF-mediated inhibition of Dusp6</b> | <b>0.3 nM</b> |
| $v$                             | Scaling factor for FGF8 loop                                   | 0.328         |

Parameters in **bold** are additions to the Goldbeter-Pourquié model.

**Initial variable values:**

#### Notch loop

| Variable                   | Description                              | Value            |
|----------------------------|------------------------------------------|------------------|
| $N$                        | Notch in the membrane                    | 0.0552 nM        |
| $N_a$                      | Activated Notch                          | 0.8095 nM        |
| $N_{an}$                   | Activated Notch in the nucleus           | 0.0039 nM        |
| <b><math>N_{ap}</math></b> | <b>Phosphorylated Notch</b>              | <b>0.0013 nM</b> |
| $MF$                       | Lunatic Fringe mRNA                      | 0.003 nM         |
| $F$                        | Lunatic Fringe protein                   | 0.0006 nM        |
| <b><math>MDMF</math></b>   | <b>Delta Modification Factor mRNA</b>    | <b>0.0011 nM</b> |
| <b><math>DMF</math></b>    | <b>Delta Modification Factor protein</b> | <b>0.0003 nM</b> |
| <b><math>DL_c</math></b>   | <b>Delta protein in the cytoplasm</b>    | <b>0.0138 nM</b> |
| <b><math>DL_m</math></b>   | <b>Delta protein on the membrane</b>     | <b>0.0058 nM</b> |

Variables in **bold** are additions to the Goldbeter-Pourquié model.

#### Wnt loop

| Variable | Description                     | Value     |
|----------|---------------------------------|-----------|
| $K$      | Free Gsk3 protein               | 1.2252 nM |
| $B$      | $\beta$ -catenin                | 0.9118 nM |
| $B_p$    | Phosphorylated $\beta$ -catenin | 0.0171 nM |
| $B_N$    | Nuclear $\beta$ -catenin        | 0.4324 nM |
| $Max$    | Axin2 mRNA                      | 7.7560 nM |
| $A$      | Axin2 protein                   | 0.1076 nM |
| $AK$     | Axin2-Gsk3 complex              | 1.7747 nM |

#### FGF loop

| Variable | Description                      | Value     |
|----------|----------------------------------|-----------|
| $Ras_a$  | Activated Ras protein            | 1.9912 nM |
| $ERK_a$  | Activated ERK protein            | 1.9780 nM |
| $X_a$    | Activated transcription factor X | 1.9777 nM |
| $MDusp$  | Dusp mRNA                        | 2.9054 nM |
| $Dusp$   | Dusp protein                     | 0.7692 nM |
